# Supplementary material for: Study on the influence of seafloor soft soil layer on seismic ground motion
Source: Copernicus journal article supplement (doi:10.5194/nhess-2020-177), 2020-07-29
Supplement: Supplementary file [file nhess-2020-177-AC1-supplement.pdf]

Dear Referee 1. We appreciate your positive comments on the manuscript.

I will revise or explain the following three comments one by one.

1. The word “Plane” indicates the meaning of inputting seismic waves in a two-dimensional plane, and of course it is no problem to remove them.

2. We replot the figure 1, changed it to a color picture, and improved the quality. The new figure 1 is as follows:

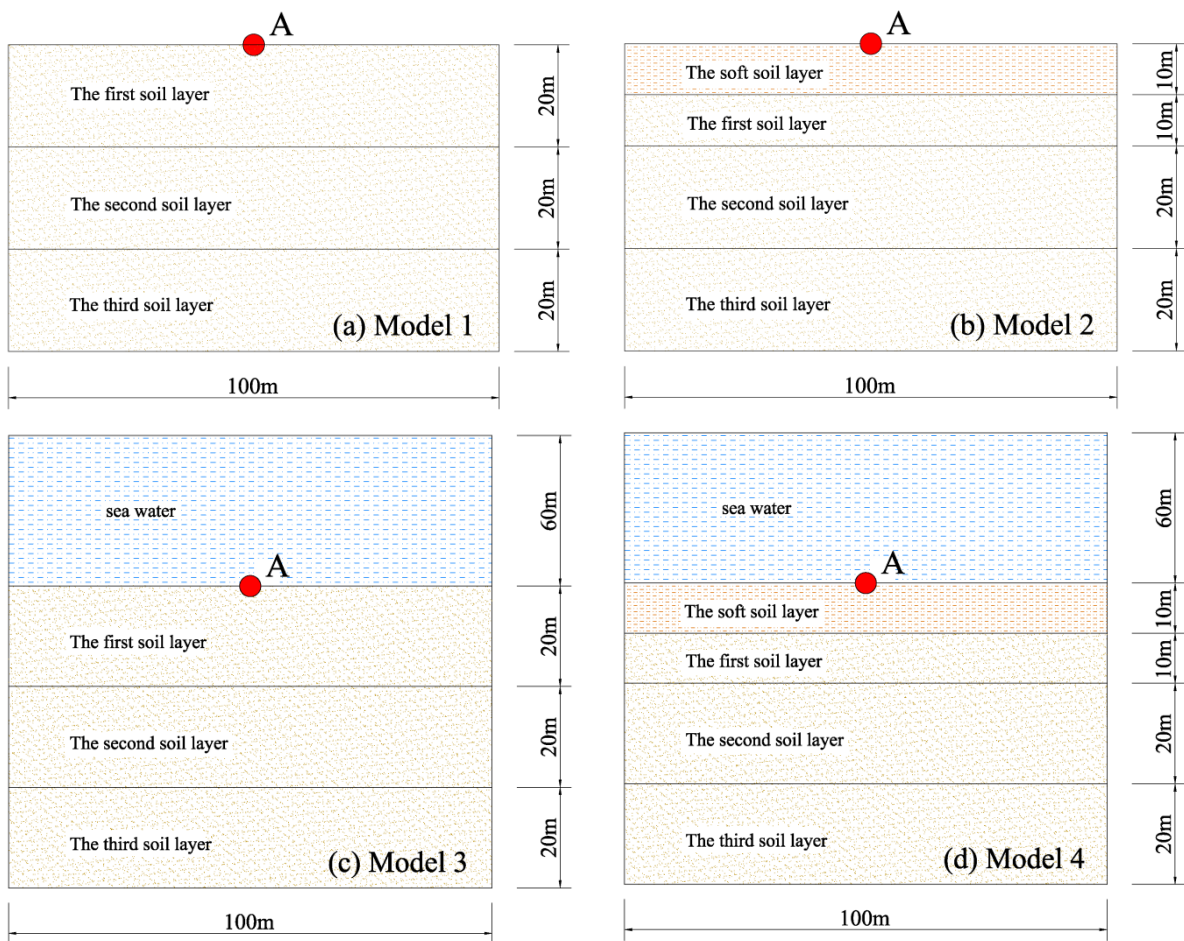

**Figure 1.** Four typical free field models

3. The Fourier spectra of Kobe and El Centro waves are supplemented in this paper. The new figure 2 is as follows:

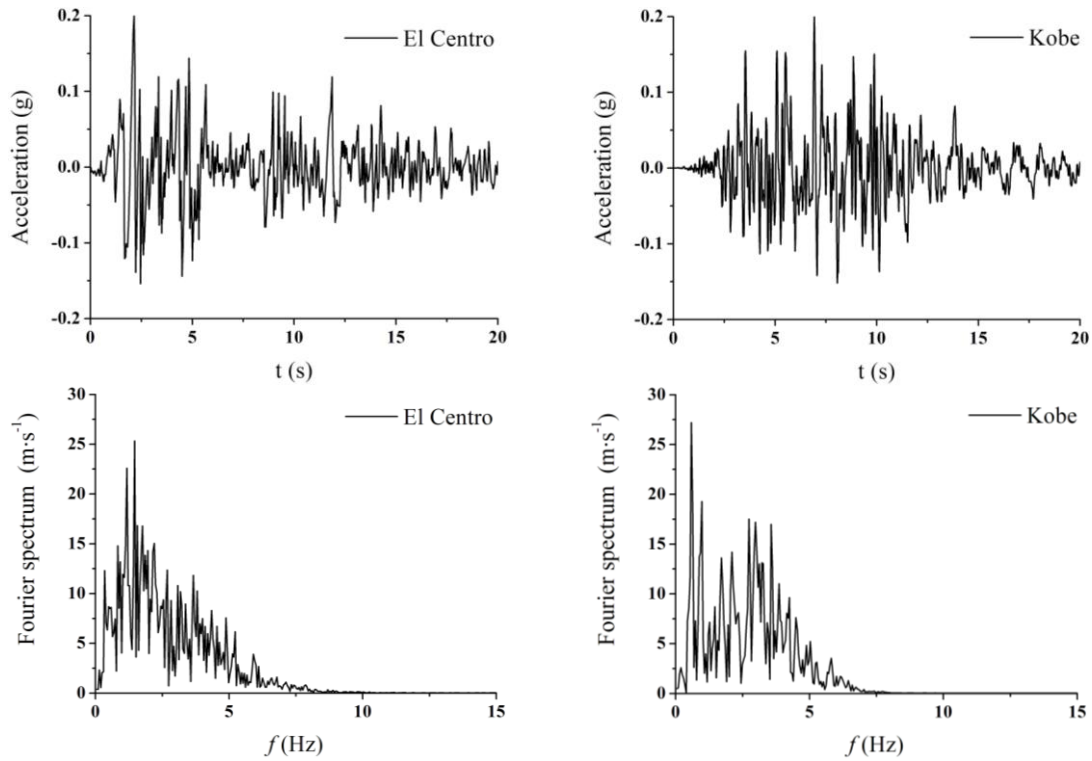

**Figure 2.** Acceleration time history curve of seismic waves

4. In this paper, the estimation formula of grid size is given in formula 10,  $\Delta l \leq (\frac{1}{10} \sim \frac{1}{8})\lambda$ . The main reason for the difference between the grid input of SV wave and P wave is that the propagation velocity of SV wave and P wave is different, refer to formula 11,  $\lambda = \frac{V}{f}$ . Where,  $\Delta l$  is the maximum grid size,  $\lambda$  is the minimum input wavelength,  $f$  is the highest frequency of seismic wave,  $V$  is the wave velocity of seismic wave. By substituting the soil parameters into the above formula, we can get the value of  $\Delta l = 3\text{m}$  in the form of SV wave input and  $\Delta l = 17\text{m}$  in the form of P wave input. In order to improve the simulation accuracy, the mesh size of SV wave input is  $2\text{m} \times 2\text{m}$ , and that of P wave input is  $5\text{m} \times 5\text{m}$ .

Thank you for providing us with comments and suggestions on our manuscript.
